# Supplementary material for: Conjugated polyelectrolytes for stable perovskite solar cells based on methylammonium lead triiodide
Source: Royal Society of Chemistry journal article supplement (doi:10.1039/d1ta10185d), 2022-01-01
Supplement: d1ta10185d1.pdf [file d1ta10185d1.pdf]

## Conjugated polyelectrolytes for stable perovskite solar cells based on methylammonium lead triiodide

*Yong Ryun Kim<sup>†a</sup>, Juae Kim<sup>†b</sup>, Heejoo Kim<sup>\*c</sup>, Hyungcheol Back<sup>e</sup>, Geunjin Kim<sup>d</sup>, Ayeong Gu<sup>e</sup>, Chang-Yong Nam<sup>f</sup>, Ju-Hyeon Kim<sup>g</sup>, Hongsuk Suh<sup>\*b</sup>, Kwanghee Lee<sup>\*a,e,g</sup>*

<sup>a</sup> Research Institute for Solar and Sustainable Energies (RISE), Gwangju Institute of Science and Technology (GIST), Gwangju 61005, Republic of Korea

<sup>b</sup> Department of Chemistry and Chemistry Institute for Functional Materials, Pusan National University (PNU), Busan 46241, Republic of Korea

<sup>c</sup> Graduate School of Energy Convergence, Institute of Integrated Technology, Gwangju Institute of Science and Technology (GIST), Gwangju 61005, Republic of Korea

<sup>d</sup> Division of Advanced Materials, Korea Research Institute of Chemical Technology (KRICT), Daejeon 34114, Republic of Korea

<sup>e</sup> Heeger Center for Advanced Materials (HCAM), Gwangju Institute of Science and Technology (GIST), Gwangju 61005, Republic of Korea

<sup>f</sup> Centre for Functional Nanomaterials, Brookhaven National Laboratory (BNL), Upton, New York 11973, United States

<sup>g</sup> School of Materials Science and Engineering, Gwangju Institute of Science and Technology, Gwangju 61005, Republic of Korea

†† Y.R.K. and J.K. contributed equally to this work

Address correspondence to heejook@gist.ac.kr, hssuh@pusan.ac.kr, klee@gist.ac.kr,

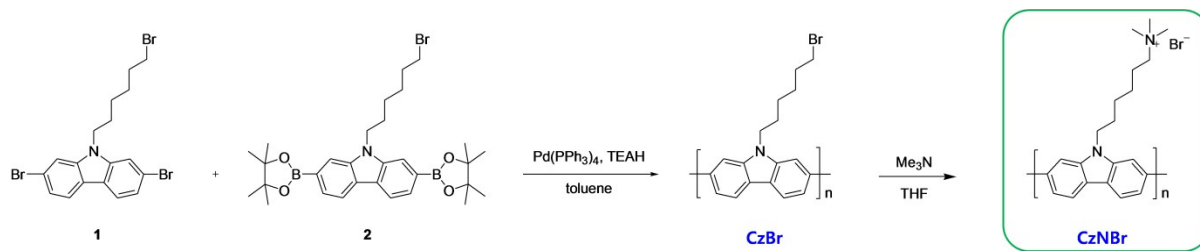

Fig. S1 - Synthetic route of CzNBr.

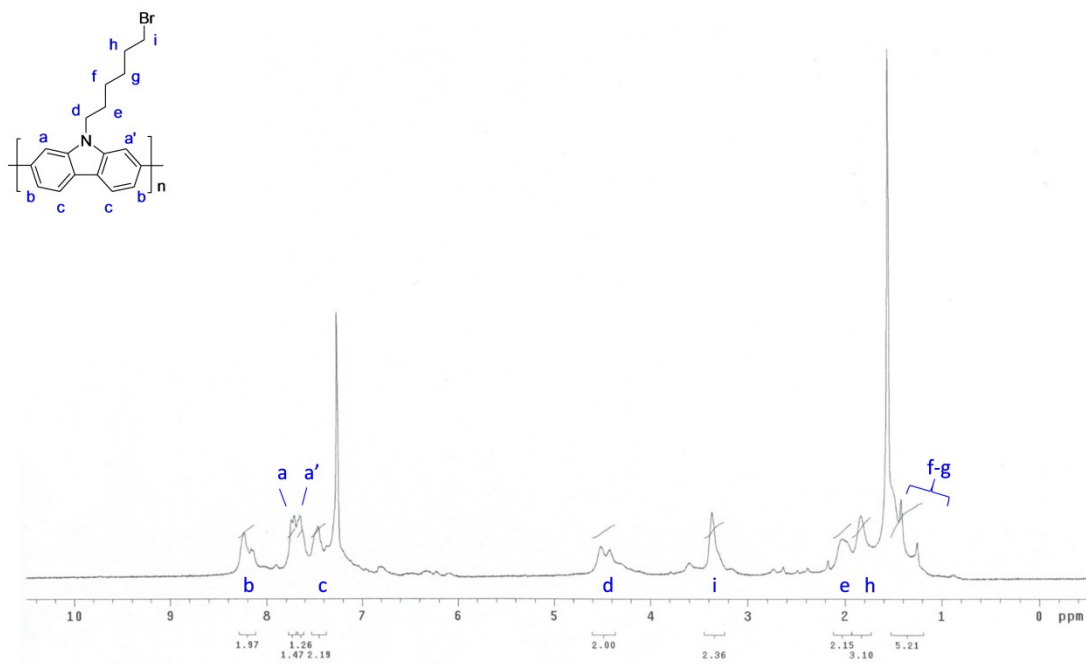

Fig. S2 - <sup>1</sup>H NMR of CzB.

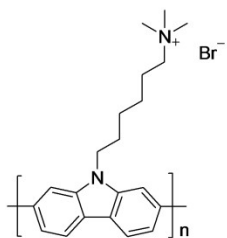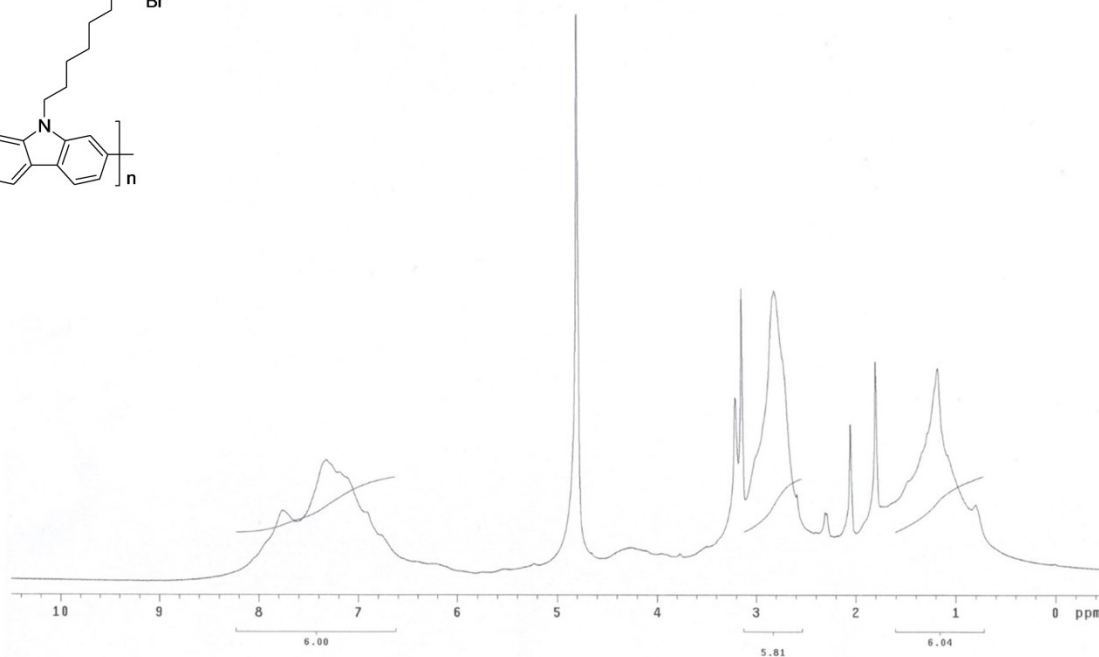

Fig. S3 - <sup>1</sup>H NMR of CzNBr.

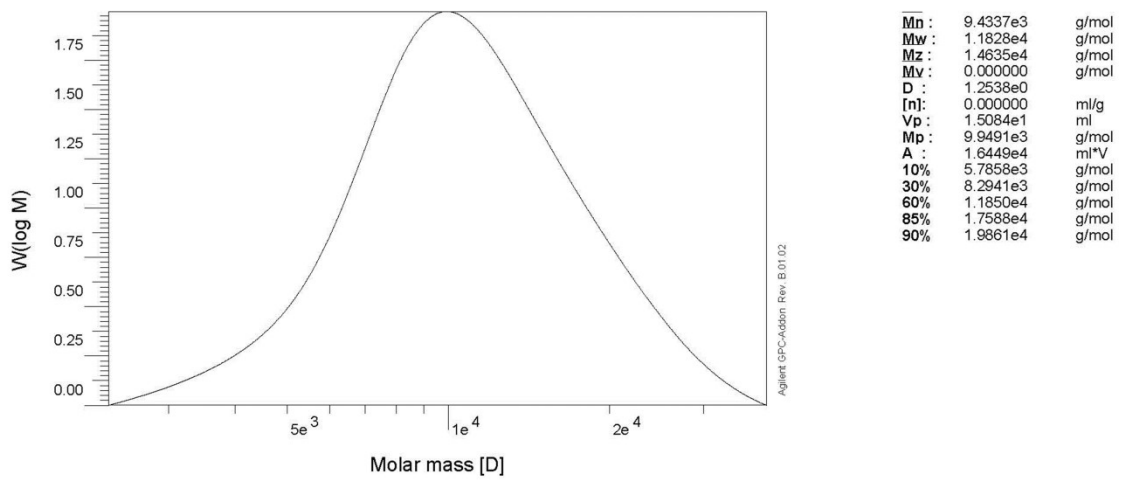

Fig. S4 - Gel Permeation Chromatography (GPC) data of CzNBr.

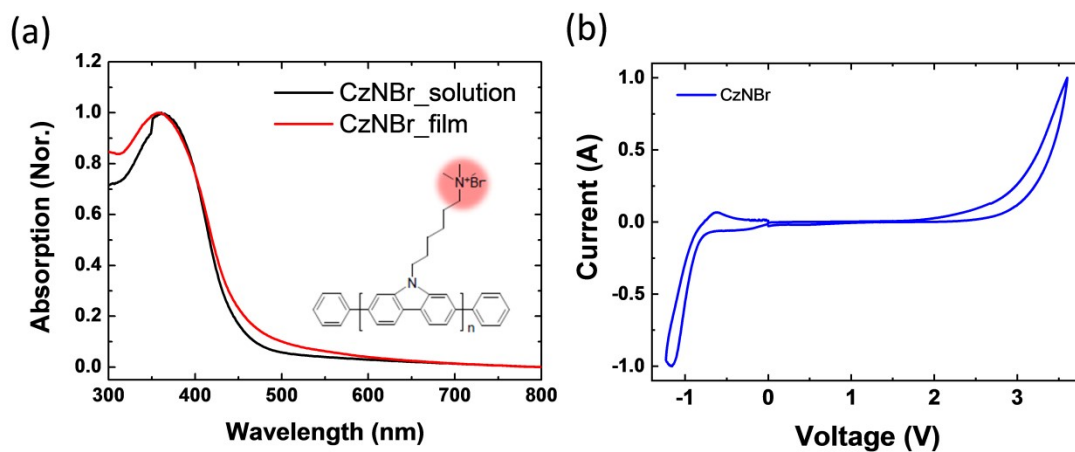

|              | $\lambda_{\text{max-solution}}^{\text{a}}(\text{nm})$ | $\lambda_{\text{max-film}}(\text{nm})^{\text{a}}$ | $E_g^{\text{opt}}(\text{eV})^{\text{b}}$ | HOMO (eV) | LUMO (eV) | $E_g^{\text{ele}}(\text{eV})$ |
|--------------|-------------------------------------------------------|---------------------------------------------------|------------------------------------------|-----------|-----------|-------------------------------|
| <b>CzNBr</b> | 363                                                   | 360                                               | 2.74                                     | -6.79     | -3.95     | 2.84                          |

\*  $E_{\text{HOMO}} = -([\text{E}_{\text{onset}}]_{\text{ox}} + 4.8) \text{ eV}$ ,  $E_{\text{LUMO}} = -([\text{E}_{\text{onset}}]_{\text{red}} + 4.8) \text{ eV}$

Fig. S5 - Optical and electrochemical characteristics of CzNBr in solution and film.

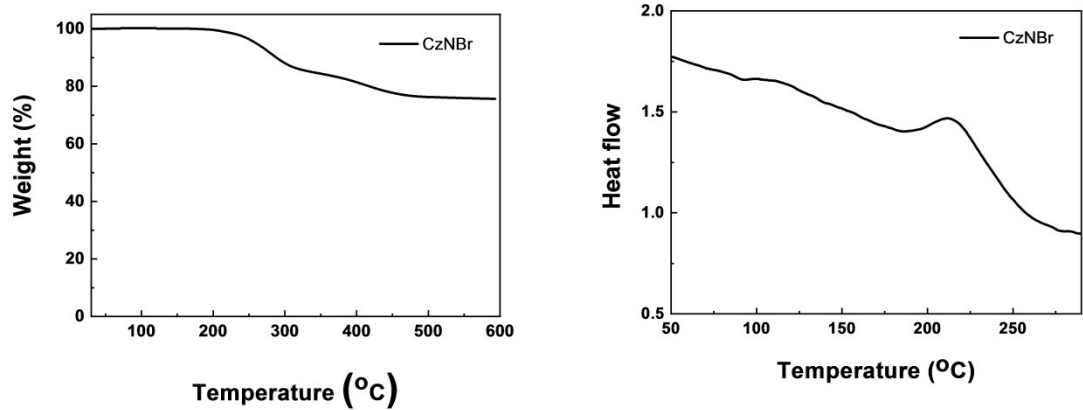

Fig. S6 - Thermogravimetric analysis (TGA) of CzNBr under N<sub>2</sub> conditions.

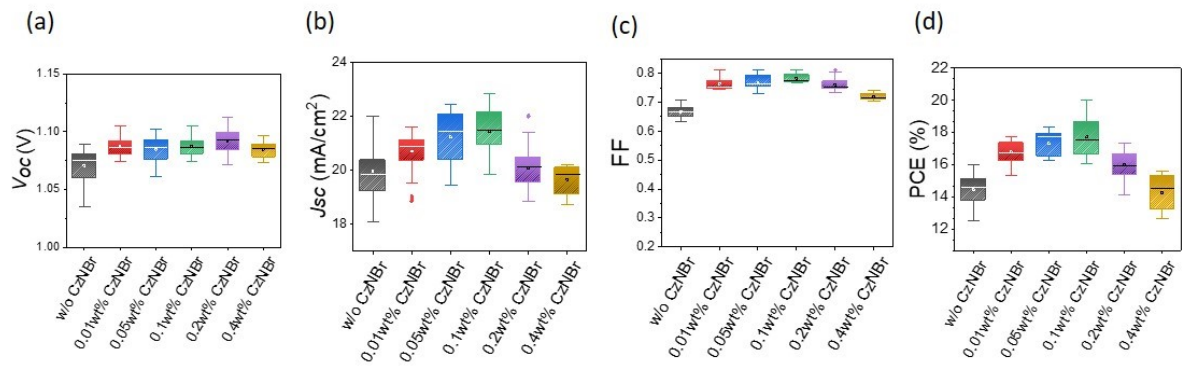

Fig. S7 - Statics of the device parameters depending on various concentrations of CzNBr solution from 0 to 0.4 wt%. (a) The  $V_{oc}$ , (b)  $J_{sc}$ , (c) FF and (d) PCE were calibrated for 30 devices for each condition.



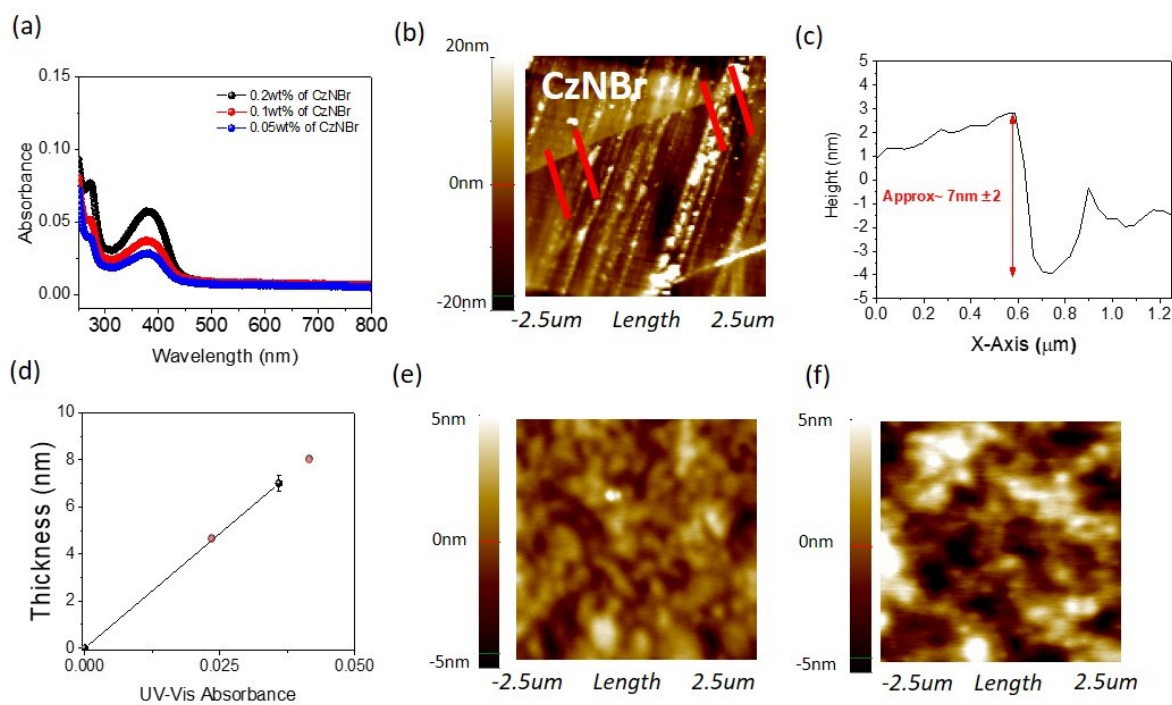

Fig. S8 - (a) UV-Vis spectra of 0.2, 0.1 and 0.05 wt% CzNBr layers deposited on a quartz substrate. (b) AFM images of 0.1 wt% CzNBr deposited on the ITO substrate. (c) The height profiles are measured along the red lines in the corresponding images of (b). (d) shows the estimation of film thickness corresponding to the UV-Vis absorbance of CzNBr according to Beer-lambert's law. (e) and (f) AFM images of the surface morphology corresponding to the structures ITO/PTAA/PFN-Br/MAPbI<sub>3</sub>/PC<sub>61</sub>BM and ITO/PTAA/PFN-Br/MAPbI<sub>3</sub>/PC<sub>61</sub>BM/CzNBr.

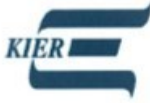

# Test Results

Report No. : KIER-19-0451  
Page(3) / (4)Pages

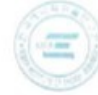

[Appendix 1]

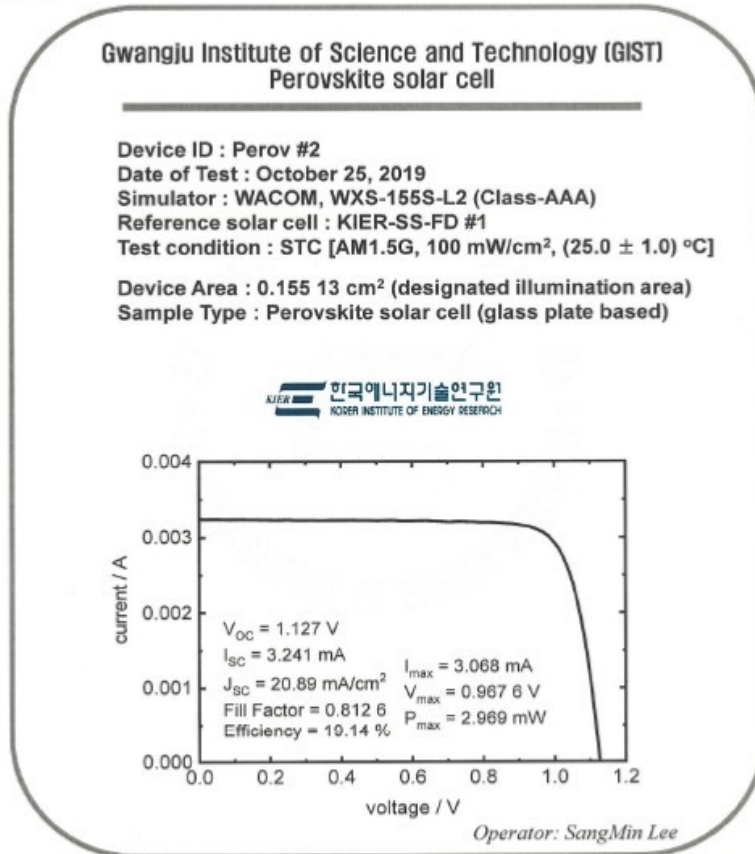

Photovoltaics Laboratory, Korea Institute of Energy Research  
152, Gajeong-ro, Yuseong-gu, Daejeon, 34129, Korea  
Tel : +82-42-860-3182, e-mail : notask@kier.re.kr

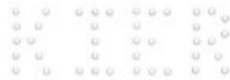

Fig. S9 - Certificated *J-V* characteristics and photovoltaic parameters of CzNBr devices from the Korea Institute of Energy Research (active area of 0.155 cm<sup>2</sup>).

|                  | Sweep Direction | $J_{sc}$ (mA/cm <sup>2</sup> ) | Integrated $J_{sc}$ (mA/cm <sup>2</sup> ) |
|------------------|-----------------|--------------------------------|-------------------------------------------|
| <b>w/o CzNBr</b> | FWD             | 20.75                          | 20.20                                     |
|                  | REV             | 20.67                          | 20.20                                     |
| <b>w/ CzNBr</b>  | FWD             | 22.70                          | 21.64                                     |
|                  | REV             | 22.78                          | 21.64                                     |

Table S1. Summary of  $J_{sc}$  values obtained from the  $J$ - $V$  curve and integrated  $J_{sc}$  values from EQE spectra.

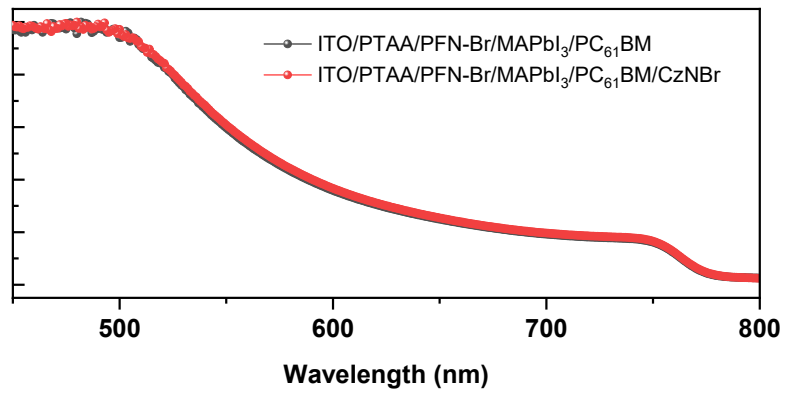

Fig. S10 - (a) UV-Vis spectra of ITO/PTAA/PFN-Br/MAPbI<sub>3</sub>/PC<sub>61</sub>BM and ITO/PTAA/PFN-Br/MAPbI<sub>3</sub>/PC<sub>61</sub>BM/CzNBr.

Table S2. The reported device performance based on pure MAPbI<sub>3</sub> with no additives engineering with n-i-p and p-i-n structure.

| Device Structure | Metal Electrode | Charge Transport Layer                                | Hysteresis           | J <sub>sc</sub> (mA/cm <sup>2</sup> ) | V <sub>oc</sub> (V) | FF   | PCE (%) | ref      |
|------------------|-----------------|-------------------------------------------------------|----------------------|---------------------------------------|---------------------|------|---------|----------|
| N-I-P            | Ag              | TiO <sub>2</sub> /NMTTF                               | Yes                  | 22.9                                  | 1.09                | 76.5 | 19.5    | 1        |
|                  | Au              | SnO <sub>2</sub> :Eu <sup>3+</sup>                    | Yes                  | 22.57                                 | 1.06                | 77.7 | 20.1    | 2        |
|                  | Au              | Lanthanum (La)-doped BaSnO <sub>3</sub>               | Yes                  | 23.4                                  | 1.12                | 81.3 | 21.2    | 3        |
|                  | Au              | c-TiO <sub>2</sub> /Li-doped m-TiO <sub>2</sub>       | Yes                  | 21.46                                 | 1.05                | 81.1 | 18.3    | 4        |
|                  | Au              | SnO <sub>2</sub>                                      | No                   | 22.81                                 | 1.07                | 77.6 | 18.94   | 5        |
| P-I-N            | Cu              | Vacuum processed C60/BCP                              | Yes (Single Crystal) | 23.68                                 | 1.14                | 0.81 | 21.9    | 6        |
|                  | Ag              | Vacuum processed /BCP/Bi                              | No                   | 21.62                                 | 1.10                | 0.76 | 18.02   | 7        |
|                  | Al              | Solution processed PC <sub>61</sub> BM(Graphdiyne)ZnO | -                    | 23.3                                  | 1.02                | 78.4 | 20%     | 8        |
|                  | Ag              | Solution processed TBAOH-SnO <sub>2</sub>             | No                   | 21.6                                  | 1.08                | 80.5 | 18.77   | 9        |
|                  | Cu              | Solution processed PC <sub>61</sub> BM/BCP            | No                   | 21.45                                 | 1.09                | 0.79 | 18.35   | 10       |
|                  | Cu              | Vacuum processed C <sub>60</sub> /BCP                 | No                   | 22.3                                  | 1.07                | 79   | 19.1    | 11       |
| P-I-N            | Cu              | Solution processed PC <sub>61</sub> BM/CzNBr          | No                   | 22.78                                 | 1.15                | 0.80 | 20.3    | Our Work |

Reference for Table S2

1. H. Wang, M. Chen, F. Li, R. Sun, P. Wang, F. Ye, H. Zhang, W. Miao, D. Liu and T. Wang, *ACS Applied Energy Materials*, 2020, **3**, 9824-9832.
2. Y. Chen, X. Zuo, Y. He, F. Qian, S. Zuo, Y. Zhang, L. Liang, Z. Chen, K. Zhao, Z. Liu, J. Gou and S. Liu, *Advanced Science*, 2021, **8**, 2001466.
3. S. S. Shin, E. J. Yeom, W. S. Yang, S. Hur, M. G. Kim, J. Im, J. Seo, J. H. Noh and S. I. Seok, *Science*, 2017, **356**, 167-171.
4. P. Holzhey, P. Yadav, S.-H. Turren-Cruz, A. Ummadisingu, M. Grätzel, A. Hagfeldt and M. Saliba, *Materials Today*, 2019, **29**, 10-19.
5. M. B. Johansson, L. Xie, B. J. Kim, J. Thyr, T. Kandra, E. M. J. Johansson, M. Göthelid, T. Edvinsson and G. Boschloo, *Nano Energy*, 2020, **78**, 105346.
6. A. Y. Alsalloum, B. Turedi, X. Zheng, S. Mitra, A. A. Zhumekenov, K. J. Lee, P. Maity, I. Gereige, A. AlSaggaf, I. S. Roqan, O. F. Mohammed and O. M. Bakr, *ACS Energy Letters*, 2020, **5**, 657-662.
7. S. Wu, R. Chen, S. Zhang, B. H. Babu, Y. Yue, H. Zhu, Z. Yang, C. Chen, W. Chen, Y. Huang, S. Fang, T. Liu, L. Han and W. Chen, *Nature Communications*, 2019, **10**, 1161.
8. J. Li, T. Jiu, C. Duan, Y. Wang, H. Zhang, H. Jian, Y. Zhao, N. Wang, C. Huang and Y. Li, *Nano Energy*, 2018, **46**, 331-337.
9. P.-H. Lee, T.-T. Wu, K.-Y. Tian, C.-F. Li, C.-H. Hou, J.-J. Shyue, C.-F. Lu, Y.-C. Huang and W.-F. Su, *ACS Applied Materials & Interfaces*, 2020, **12**, 45936-45949.
10. J.-H. Kim, Y. R. Kim, B. Park, S. Hong, I.-W. Hwang, J. Kim, S. Kwon, G. Kim, H. Kim and K. Lee, *Small*, 2021, **17**, 2005608.
11. X. Wang, K. Rakstys, K. Jack, H. Jin, J. Lai, H. Li, C. S. K. Ranasinghe, J. Saghaei, G. Zhang, P. L. Burn, I. R. Gentle and P. E. Shaw, *Nature Communications*, 2021, **12**, 52.

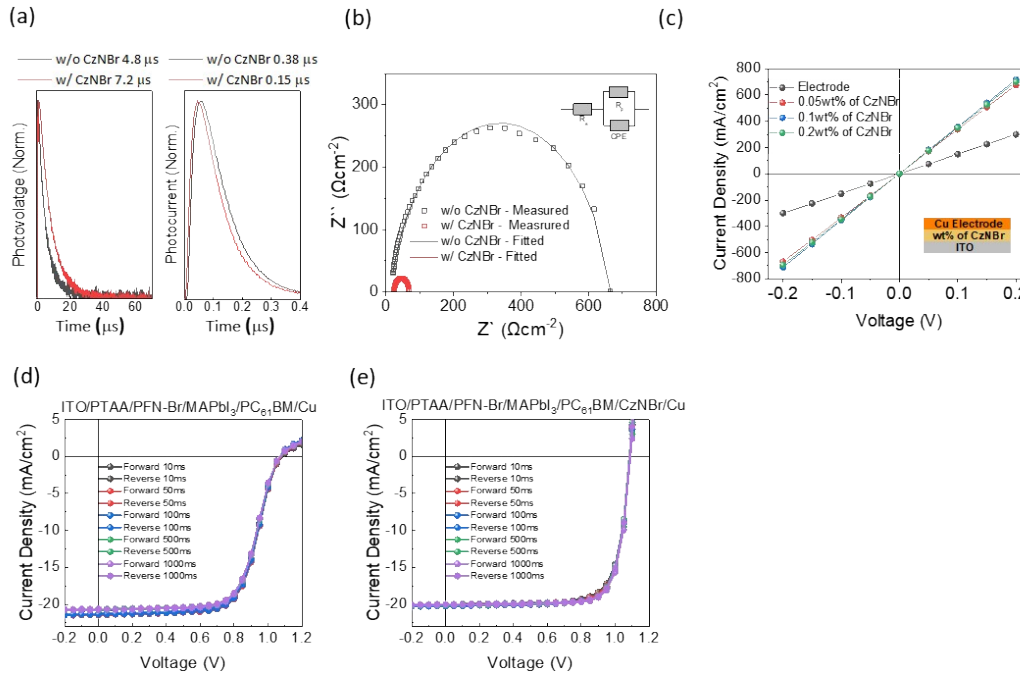

Fig. S11 - (a) Normalized transient photovoltage (TPV, left) and transient photocurrent (TPC, right) decay curves for the I-PSCs with and without CzNBr. (b) Electrochemical impedance spectroscopy (EIS) for I-PSCs with and without CzNBr. Nyquist plots for both devices obtained from the EIS measurement under open-circuit conditions with constant photoirradiation (1 sun,  $100 \text{ mW}/\text{cm}^2$ ), and the inset shows the fitting of the EIS curve to an equivalent circuit model. (c) Series resistance of J-V curves of the Cu electrode and ITO/0.05, 0.1, and 0.2 wt% of CzNBr/Cu. J-V curves for the I-PSC device (d) without and (e) with CzNBr under different scan rates from 10 to 1000 ms.

Table S3. Electrochemical impedance spectroscopy (EIS) measurement fitted parameters for the control and CzNBr devices

|                  | <b>R<sub>p</sub> (<math>\Omega\text{cm}^{-2}</math>)</b> | <b>R<sub>s</sub> (<math>\Omega\text{cm}^{-2}</math>)</b> | <b>CPE.</b> |
|------------------|----------------------------------------------------------|----------------------------------------------------------|-------------|
| <b>w/o CzNBr</b> | 651.40                                                   | 13.33                                                    | 0.883       |
| <b>w/ CzNBr</b>  | 45.14                                                    | 23.50                                                    | 0.990       |



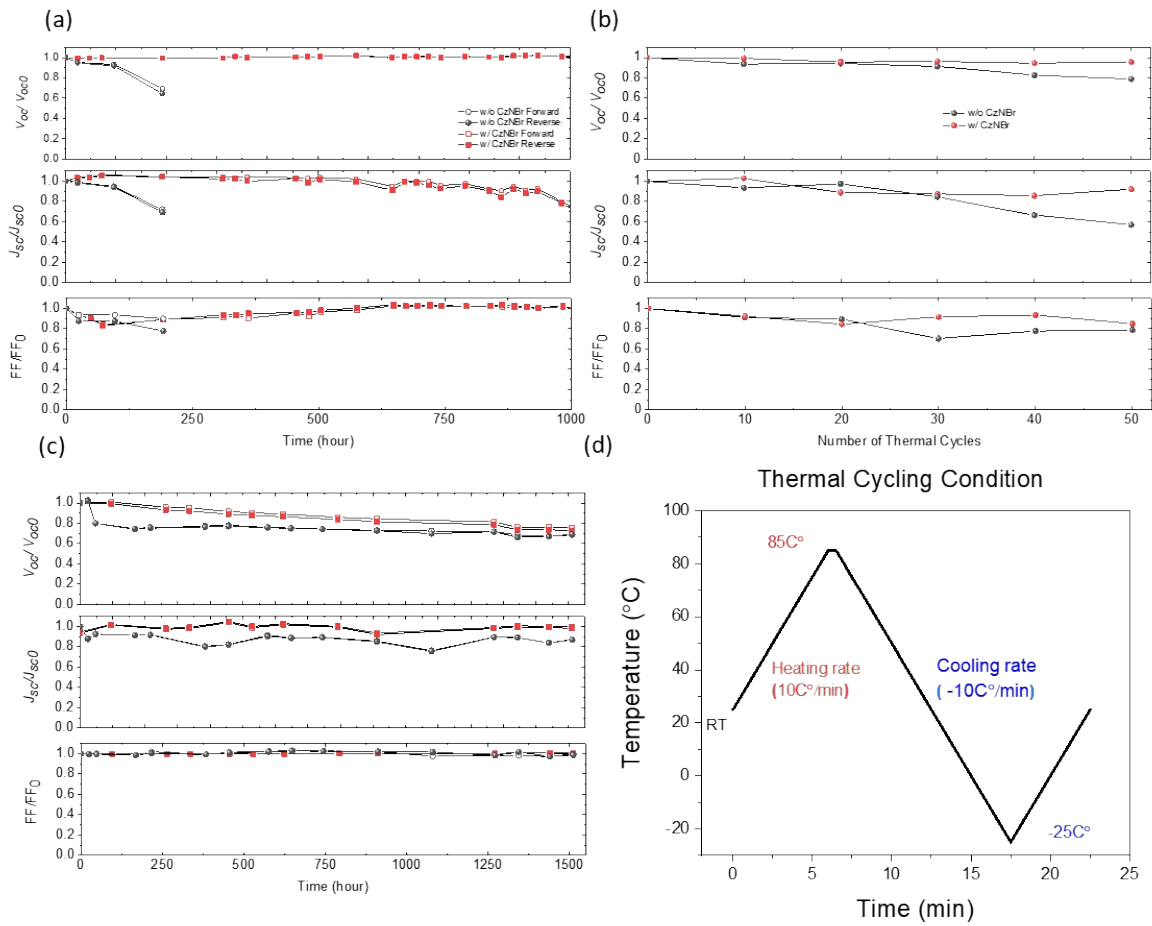

Fig. S12 - Other photovoltaic parameters of the operational stability test of the control and CzNBr device. (a) PCE variations of the control and CzNBr device under continuous thermal annealing at 85°C for 1000 hours under a nitrogen gas atmosphere. (b) PCE variation obtained from the  $J$ - $V$  characteristics of the control and CzNBr device after a thermal cycling test of 50 cycles at temperatures between -25°C and 85°C (PCE obtained every 10 cycles in ambient air conditions). (c) Environmental stability performance of the control and CzNBr device under ambient conditions (20-40% relative humidity,  $T = 25^\circ\text{C}$ ) and (d) thermal cycling test conditions for one cycle under high vacuum.

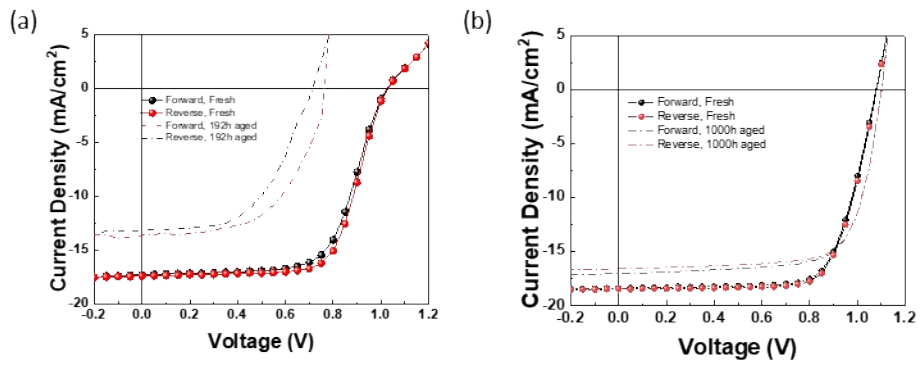

Fig. S13 - *J-V* curves for the cases of as-cast and thermally annealed (a) control and (b) CzNBr devices.

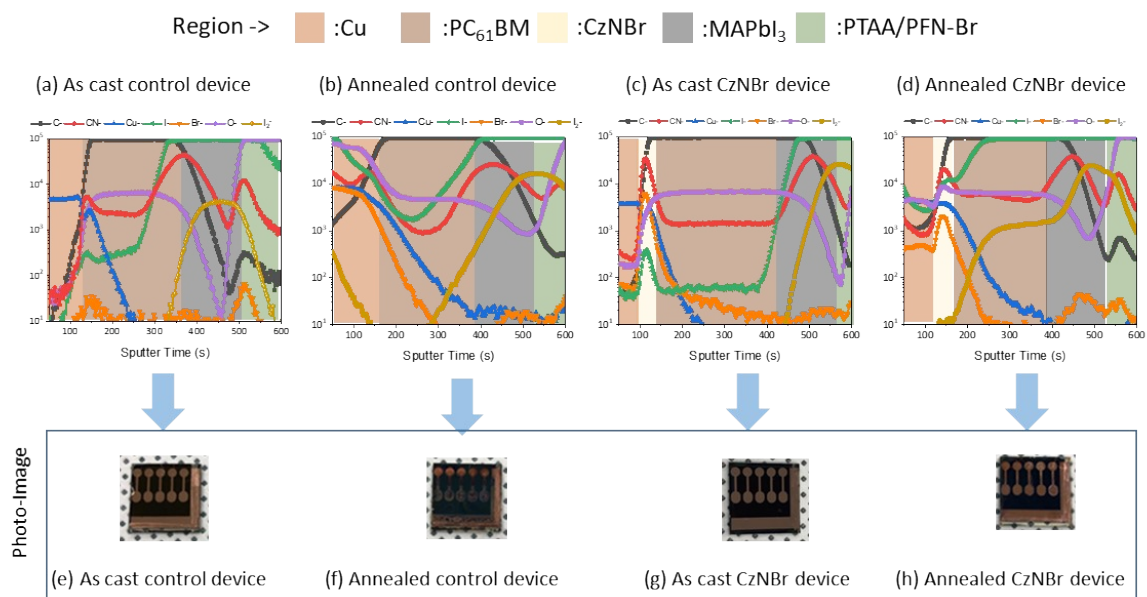

Fig. S14 - ToF-SIMS depth profiles throughout the as-cast and thermally annealed control and CzNBr device. Photographs taken for the control and CzNBr devices before and after 500 h of thermal annealing at 85°C in a N<sub>2</sub>-filled glove box. (a), (e) As-cast control device, (b), (f) thermally annealed control device, (c), (g) as-cast CzNBr device and (d), (h) thermally annealed CzNBr device.

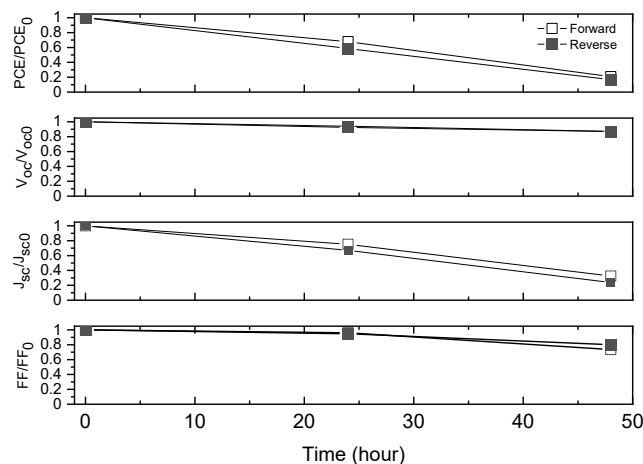

Fig. S15 - The thermal stability test of BCP based device (ITO/PTAA/PFN-Br/MAPBI<sub>3</sub>/PC<sub>61</sub>BM/BCP/Cu) under continuous thermal annealing at 85°C for 50 hours under a nitrogen gas atmosphere

We tested PSC with BCP layer, which is typically used as cathode buffer layer rather than ion scavenging layer in the inverted PSCs. The only function of BCP layer is a modification of the WF of metal electrode to reduce the interfacial barrier at the interface for effectively charge carrier transport. Therefore, BCP based device exhibited relatively poor thermal stability compared to CzNBr based device.

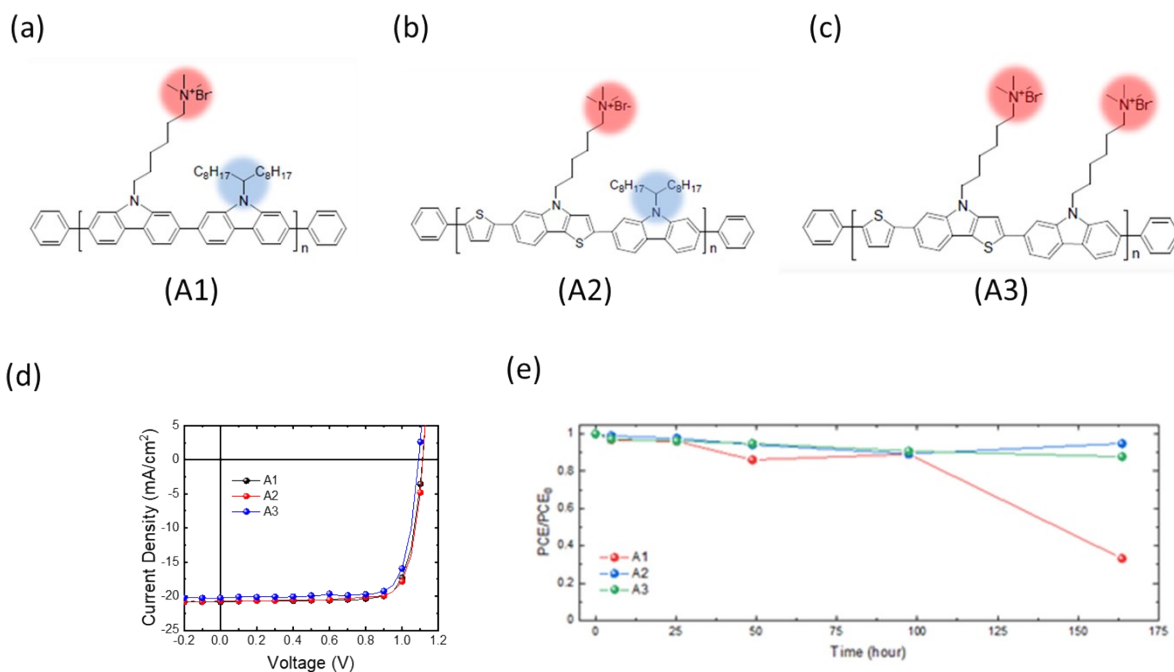

Fig. S16 - (a)-(c) other CPEs (d) J-V curve of PSCs with other CPEs (A1, A2, and A3) (ITO/PTAA/PFN-Br/MAPBI<sub>3</sub>/PC<sub>61</sub>BM/A1, A2 or A3/Cu) and (e) The thermal stability test under continuous thermal annealing at 85°C for 150 hours under a nitrogen gas atmosphere

Photovoltaic performance of PSCs with other CPEs, which have similar chemical structures with CzNBr (A1, A2, and A3), are compared. Thermal stability test for these devices are also tested. However, the best result was obtained with CzNBr layer.

Table S4. Summary of photovoltaic parameter corresponding to the  $J$ - $V$  curve of Fig. S16

|           | <b>Sweep Direction</b> | <b><math>V_{oc}</math> (V)</b> | <b><math>J_{sc}</math> (mA/cm<sup>2</sup>)</b> | <b>FF (%)</b> | <b>PCE(%)</b> |
|-----------|------------------------|--------------------------------|------------------------------------------------|---------------|---------------|
| <b>A1</b> | Forward                | 1.111                          | 20.82                                          | 0.79          | 18.29         |
| <b>A2</b> | Forward                | 1.113                          | 20.65                                          | 0.80          | 18.32         |
| <b>A3</b> | Forward                | 1.090                          | 20.23                                          | 0.79          | 17.43         |

| Device Structure                                                   | Perovskite Layer   | CTL                                  | Fabrication method for CTL                        | PCE (%) | Degradation Factors                                          |                                       |                           | Ref      |                     |
|--------------------------------------------------------------------|--------------------|--------------------------------------|---------------------------------------------------|---------|--------------------------------------------------------------|---------------------------------------|---------------------------|----------|---------------------|
|                                                                    |                    |                                      |                                                   |         | Heat (85°C)                                                  | Light                                 | Moisture (air)            |          |                     |
| ITO/PTAA/perovskite/C <sub>60</sub> /BCP/Cu                        | CsFAMAPbI          | C <sub>60</sub> /BCP/                | Vacuum deposition                                 | 22.3    | 1000h in N <sub>2</sub> *                                    | MPP <sup>o</sup>                      | 1000h in N <sub>2</sub> * | -        | 1                   |
| FTO/NiO/perovskite/PCBM/BCP/Cr(Cr <sub>2</sub> O <sub>3</sub> )/Au | CsFAMAPbI          | Cr (Cr <sub>2</sub> O <sub>3</sub> ) | Vacuum deposition                                 | 19.8    | -                                                            | Light soaking (76mWcm <sup>-2</sup> ) | 1800h in air*             | -        | 2                   |
| ITO/PEDOT:PSS/perovskite/C <sub>60</sub> /BCP/Ag                   | CsSnFAPbI          | C <sub>60</sub> /BCP                 | Vacuum deposition                                 | 16.6    | 1000h in air*                                                | MPP, Sulphur lamp 0.8 sun             | 1000h in N <sub>2</sub> * | -        | 3                   |
| ITO/PTAA/perovskite/pasivation/C <sub>60</sub> /BCP/Cu             | FAMAPbIBr          | C <sub>60</sub> /BCP                 | Room temperature <sup>∇</sup> + Vacuum deposition | 21      | -                                                            | MPP                                   | 25h                       | 35 days  | 4                   |
| ITO/NiO <sub>2</sub> /perovskite/ZnO/Al                            | MAPbI <sub>3</sub> | NiOx                                 | Heat at 300°C for 60min <sup>∇</sup>              | 16.1    | -                                                            | -                                     | -                         | 60 days  | 5                   |
| ITO/PTAA/perovskite/PCBM/TiOx/Ag                                   | MAPbI <sub>3</sub> | TiOx                                 | Heat at 100°C for 5min <sup>∇</sup>               | 16.09   | -                                                            | MPP                                   | 11h in N <sub>2</sub>     | 200h     | 6                   |
| IT <sup>2</sup> PEDOT:PSS/perovskite/PC <sub>71</sub> BM/Ca/Al     | MAPbI <sub>3</sub> | Ca/Al                                | Vacuum deposition                                 | 20.1    | -                                                            | MPP                                   | 500s in N <sub>2</sub>    | 30 days* | 7                   |
| ITO/PTAA/perovskite/PCBM/TiOx/Cu                                   | MAPbI <sub>3</sub> | TiOx                                 | Vacuum Processing for 100hours                    | 18.8    | 1000h in N <sub>2</sub>                                      | MPP                                   | 1000h in N <sub>2</sub>   | -        | 8                   |
| FTO/NiO/perovskite/PCBM/Ag                                         | MAPbI <sub>3</sub> | NiOx                                 | Heat at 500°C for 30min                           | 19.19   | 500h                                                         | Light soaking <sup>o</sup>            | 1000h in N <sub>2</sub> * | -        | 9                   |
| ITO/PTAA/perovskite/PCBM/C <sub>60</sub> /BCP/Cu                   | MAPbI <sub>3</sub> | C <sub>60</sub> /BCP                 | Vacuum deposition                                 | 21.1    | -                                                            | -                                     | -                         | 940h     | 10                  |
| ITO/PTAA/perovskite/PCBM/CzNBr/Cu                                  | MAPbI <sub>3</sub> | CzNBr                                | Room temperature <sup>∇</sup>                     | 20.28   | 1000h in N <sub>2</sub> (50 cycles for thermal cycling test) | MPP                                   | 350h in N <sub>2</sub>    | 1500h    | <b>In this work</b> |

Fig. S17 - Summary of state-of-the-art selected I-PSCs, including PCE and various long-term operational stabilities. Only I-PSCs retaining 80% of their initial PCE are included. For photostability, the illumination source of the xenon lamp was used during measurement unless stated otherwise.

Reference for Fig. S17

1. X. Zheng, Y. Hou, C. Bao, J. Yin, F. Yuan, Z. Huang, K. Song, J. Liu, J. Troughton, N. Gasparini, C. Zhou, Y. Lin, D.-J. Xue, B. Chen, A. K. Johnston, N. Wei, M. N. Hedhili, M. Wei, A. Y. Alsalloum, P. Maity, B. Turedi, C. Yang, D. Baran, T. D. Anthopoulos, Y. Han, Z.-H. Lu, O. F. Mohammed, F. Gao, E. H. Sargent and O. M. Bakr, *Nat. Energy*, 2020, 5, 131-140.
2. S. Bai, P. Da, C. Li, Z. Wang, Z. Yuan, F. Fu, M. Kawecki, X. Liu, N. Sakai, J. T.-W. Wang, S. Huettner, S. Buecheler, M. Fahlman, F. Gao and H. J. Snaith, *Nature*, 2019, 571, 245-250.
3. R. Prasanna, T. Leijtens, S. P. Dunfield, J. A. Raiford, E. J. Wolf, S. A. Swifter, J. Werner, G. E. Eperon, C. de Paula, A. F. Palmstrom, C. C. Boyd, M. F. A. M. van Hest, S. F. Bent, G. Teeter, J. J. Berry and M. D. McGehee, *Nat. Energy*, 2019, 4, 939-947.
4. X. Zheng, B. Chen, J. Dai, Y. Fang, Y. Bai, Y. Lin, H. Wei, Xiao C. Zeng and J. Huang, *Nat. Energy*, 2017, 2, 17102.
5. J. You, L. Meng, T.-B. Song, T.-F. Guo, Y. Yang, W.-H. Chang, Z. Hong, H. Chen, H. Zhou, Q. Chen, Y. Liu, N. De Marco and Y. Yang, *Nat. Nanotech*, 2016, 11, 75-81.
6. H. Back, G. Kim, J. Kim, J. Kong, T. K. Kim, H. Kang, H. Kim, J. Lee, S. Lee and K. Lee, *Energy Environ. Sci*, 2016, 9, 1258-1263.
7. C.-H. Chiang, M. K. Nazeeruddin, M. Grätzel and C.-G. Wu, *Energy Environ. Sci*, 2017, 10, 808-817.
8. H. Back, G. Kim, H. Kim, C.-Y. Nam, J. Kim, Y. R. Kim, T. Kim, B. Park, J. R. Durrant and K. Lee, *Energy Environ. Sci*, 2020, DOI: 10.1039/C9EE03736E.
9. Y. Wu, F. Xie, H. Chen, X. Yang, H. Su, M. Cai, Z. Zhou, T. Noda and L. Han, *Adv. Mater*, 2017, 29, 1701073.
10. M. Zhang, Q. Chen, R. Xue, Y. Zhan, C. Wang, J. Lai, J. Yang, H. Lin, J. Yao, Y. Li, L. Chen and Y. Li, *Nat. Commun*, 2019, 10, 4593.sq
